# Supplementary material for: Implementation and Effectiveness of an eHealth supported integrated care model for patients after hematopoietic cell transplantation: The Swiss SMILe hybrid effectiveness-implementation RCT
Source: Research Square preprint supplement (doi:10.21203/rs.3.rs-7837069/v1), 2025-10-30
Supplement: Supplementary file 1 [file 49b9f84873cd5f21d82fd685.docx]

**Supplementary Table S2***. Variables and measurements(Valenta et al, 2023, De Geest et al, 2022)*

|  |  | ***Measurement timepoints (T0 – Tz) and days post-Tx*** | | | | | | | | | | | **Data source** |
| --- | --- | --- | --- | --- | --- | --- | --- | --- | --- | --- | --- | --- | --- |
| **Variables** | **Measure(s)** | **T0a** | **T0b** | **T1** | **T2** | **T3** | **T4** | **T5** | **T6** | **T7** | **T8** | ***Tz*** |
| **-10** | **30** | **60** | **90** | **120** | **150** | **180** | **240** | **300** | **365** | ***455*** |
| **Demographic and Clinical Sample Characteristics** | |  |  |  |  |  |  |  |  |  |  |  |  |
| Age | In years, continuous | **x** |  |  |  |  |  |  |  |  |  |  | Medical Record, CRF |
| Sex | Male/female | **x** |  |  |  |  |  |  |  |  |  |  | Medical Record, CRF |
| Education | Categorized as lower secondary education, higher secondary education and tertiary education according to International Standard Classification of Education | **x** |  |  |  |  |  |  |  |  |  |  | Paper survey |
| Living alone | Binary: Yes/no | **x** |  |  |  |  |  |  |  |  |  |  | Paper survey |
| Referring center | Center ID code | **X** |  |  |  |  |  |  |  |  |  |  | Medical record, CRF |
| Conditioning regime | Conditioning intensity classified according to the Transplant Conditioning Intensity (TCI) score, calculated as the sum of assigned intensity weights for commonly used conditioning regimen components.(Spyridonidis *et al*, 2024, Spyridonidis *et al*, 2020) | **x** |  |  |  |  |  |  |  |  |  |  | Medical record, CRF |
| Donor match/type | Human leukocyte antigen (HLA) tissue type | **x** |  |  |  |  |  |  |  |  |  |  | Medical record, CRF |
| Disease | Primary disease classified as recommended by WHO | **x** |  |  |  |  |  |  |  |  |  |  | Medical record, CRF |
| Index hospitalization duration | Days from admission for initial HCT to discharge |  |  | **X** |  |  |  |  |  |  |  |  | Medical record, CRF |
| Drop-out rate | Defined as premature discontinuation from the study prior to final follow-up assessment. Reasons were categorized as death, clinical deterioration, withdrawal of consent, or loss to follow-up. Drop-out status and timing were recorded for all participants. | **x** | **x** | **X** | **X** | **x** | **x** | **x** | **x** | **x** | **x** | **x** | Medical record, CRF |
| Recruitment rate | Proportion of eligible participants, who were successfully enrolled in the study within the expected time frame. Actual recruitment rate was compared to the projected target defined during the study planning phase (expected to take at least 20 months).(De Geest *et al*, 2022) | **x** | **x** | **X** | **X** | **x** | **x** | **x** | **x** | **x** | **x** | **x** | Medical record, CRF |
| **Primary Implementation Outcomes** | |  |  |  |  |  |  |  |  |  |  |  |  |
| Acceptability | Assessed via 4-items on a 5-point Likert scale (1 = completely disagree, 5 = completely agree); higher scores indicate greater acceptability. | **x** | **x** | **X** | **X** | **x** | **x** | **x** | **x** | **x** | **x** |  | Paper-based survey (patient + APN): Acceptability of Intervention Measure (AIM), 4 items)(Weiner *et al*, 2017) |
| Appropriateness: | Assessed via 4-items on a 5-point Likert scale (1 = completely disagree, 5 = completely agree); higher scores indicate greater appropriateness | **x** | **x** | **X** | **X** | **x** | **x** | **x** | **x** | **x** | **x** |  | Paper-based survey (patient + APN): Intervention Appropriateness Measure (IAM), 4 Items)(Weiner *et al*, 2017) |
| Feasibility | Assessed via 4-items on a 5-point Likert scale (1 = completely disagree, 5 = completely agree); higher scores indicate greater feasibility | **x** | **x** | **X** | **X** | **x** | **x** | **x** | **x** | **x** | **x** |  | Paper-based survey (patient + APN): Feasibility of Intervention Measure (FIM), 4 items)(Weiner *et al*, 2017) |
| **Primary Effectiveness Outcome** | |  |  |  |  |  |  |  |  |  |  |  |  |
| **Unplanned re-hospitalization event** | Occurrence of first or recurrent unplanned hospital readmission during follow-up. First events were analyzed as time from index discharge to first unplanned re-hospitalization; recurrent events were modeled over the entire follow-up period using Cox proportional hazards regression. |  | **X** | **X** | **X** | **X** | **X** | **X** | **X** | **X** | **X** | **X** | Medical Records, CRF |
| **Secondary outcome** |  |  |  |  |  |  |  |  |  |  |  |  |  |
| Re-hospitalization rate | Number of events after index hospitalization in the first year post-HCT |  | **x** | **X** | **x** | **x** | **x** | **x** | **x** | **x** | **x** | **x** | Medical record, CRF |
| Length re-hospitalizations | Total length of inpatient re-hospitalizations in the first year after HCT is the total number of hospitalized days after index hospitalization until end of study |  | **x** | **X** | **x** | **x** | **x** | **x** | **x** | **x** | **x** | **x** | Medical record, CRF |
| Reasons for re-hospitalization | Documented reasons for rehospitalization based on clinical records, categorizing them into predefined groups such as infection, graft-versus-host disease (GvHD), and other transplant-related complications |  | **x** | **X** | **x** | **x** | **x** | **x** | **x** | **x** | **x** | **x** | Medical record, CRF |
| Overall survival rate | Overall survival rate from start of study participation |  | **x** | **X** | **x** | **x** | **x** | **x** | **x** | **x** | **x** | **x** | Medical record, CRF |
| If death | Date and cause of death |  | **x** | **X** | **x** | **x** | **x** | **x** | **x** | **x** | **x** | **x** | Medical record, CRF |
| If relapse | Date of relapse |  | **x** | **X** | **x** | **x** | **x** | **x** | **x** | **x** | **x** | **x** | Medical record, CRF |
| Adverse events (AEs) | Technology- or intervention-related AEs encompassed technical issues, delayed or incorrect symptom reporting, data transmission errors, privacy concerns, patient burden. |  | **x** | **X** | **x** | **x** | **x** | **x** | **x** | **x** | **x** | **x** | SMILe-App data |

**References**

1. Valenta S, Ribaut J, Leppla L, Mielke J, Teynor A, Koehly K *et al.* Context-specific adaptation of an eHealth-facilitated, integrated care model and tailoring its implementation strategies—A mixed-methods study as a part of the SMILe implementation science project. *Frontiers in Health Services* 2023; **2**. doi: <https://doi.org/10.3389/frhs.2022.977564>

2. De Geest S, Valenta, S.* *(*shared first authorship,),* , Ribaut J, Gerull S, Mielke J, Simon M, Bartakova J *et al.* The SMILE Integrated Care Model in Allogeneic SteM Cell TransplantatIon faciLitated by eHealth: A Protocol for a hybrid effectiveness-implementation randomised controlled trial. *BMC Health Services Research* 2022; **22**(1). doi: <https://doi.org/10.1186/s12913-022-08293-8>

3. Spyridonidis A, Labopin M, Gedde-Dahl T, Ganser A, Stelljes M, Craddock C *et al.* Validation of the transplant conditioning intensity (TCI) index for allogeneic hematopoietic cell transplantation. *Bone Marrow Transplant* 2024; **59**(2)**:** 217-223. e-pub ahead of print 2023/11/18; doi: 10.1038/s41409-023-02139-5

4. Spyridonidis A, Labopin M, Savani BN, Niittyvuopio R, Blaise D, Craddock C *et al.* Redefining and measuring transplant conditioning intensity in current era: a study in acute myeloid leukemia patients. *Bone Marrow Transplant* 2020; **55**(6)**:** 1114-1125. e-pub ahead of print 2020/01/31; doi: 10.1038/s41409-020-0803-y

5. Weiner BJ, Lewis CC, Stanick C, Powell BJ, Dorsey CN, Clary AS *et al.* Psychometric assessment of three newly developed implementation outcome measures. *Implementation Science* 2017; **12:** 108. doi: 10.1186/s13012-017-0635-3
