# Supplementary material for: Implementation and Effectiveness of an eHealth supported integrated care model for patients after hematopoietic cell transplantation: The Swiss SMILe hybrid effectiveness-implementation RCT
Source: Research Square preprint supplement (doi:10.21203/rs.3.rs-7837069/v1), 2025-10-30
Supplement: Supplementary file 2 [file 700ac99dba06105956f72ad9.docx]

**Supplementary Table S1.** *Contextual Adaptations Across Freiburg and Basel Study Sites*

| **Domain** | **Freiburg (Germany)**23 | **Basel (Switzerland)**31, 32 |
| --- | --- | --- |
| **Implementation setting** | University Medical Center Freiburg (Germany) | University Hospital Basel (Switzerland) |
| **Healthcare system** | German system, centralized | Swiss system, decentralized |
| **Targeted sample size** | 72 patients (36/group) | 80 patients (40/group) |
| **Primary outcome** | Cost-effectiveness (€/life-years gained) | Rehospitalization events and implementation outcomes (acceptability, feasibility, appropriateness) |
| **Local adaptation** | SMILe–ICM and its implementation strategies developed for FiB23 | Contextual adaptation to the USB’s follow-up care and outpatient model guided by FRAME and FRAME-IS (Fig. 1) |
| **Human Component** | Pre-existing inpatient APN team as part of the transplant team: Master's-prepared and had specialized expertise in HCT | New APN team partly established specifically for SMILe–ICM: Master's-prepared and had specialized expertise in HCT |
| **eHealth tool** | SMILeApp v1.0 | SMILeApp adapted for Swiss context31 |
| **Digital Infrastructure** | eHealth tools embedded in FiB’s clinical systems | Adapted to local data protection and platform integration standards at USB |
